# Supplementary material for: Characteristics of the charge transfer surface complex on titanium(iv) dioxide for the visible light induced chemo-selective oxidation of benzyl alcohol
Source: Royal Society of Chemistry journal article supplement (doi:10.1039/c1ra00417d), 2011-11-17
Supplement: c1ra00417d.pdf [file c1ra00417d.pdf]

# Characteristics of the charge transfer surface complex on titanium (IV) dioxide for the visible-light induced chemoselective oxidation of benzyl alcohol

*Shinya Higashimoto, <sup>a\*</sup>Kohei Okada, <sup>a</sup>Masashi Azuma, <sup>a</sup>Hiroyoshi Ohue, <sup>a</sup>Tadamasa Terai, <sup>a</sup> and Yoshihisa Sakata <sup>b</sup>*

*<sup>a</sup> Department of Applied Chemistry, College of Engineering, Osaka Institute of Technology  
5-16-1 Omiya, Asahi-ku, Osaka 535-8585, Japan*

*<sup>b</sup> Graduate School of Science and Engineering, Yamaguchi University  
2-16-1 Tokiwadai, Ube 755-8611, Japan*

Author E-mail address: higashimoto@chem.oit.ac.jp (Shinya Higashimoto)

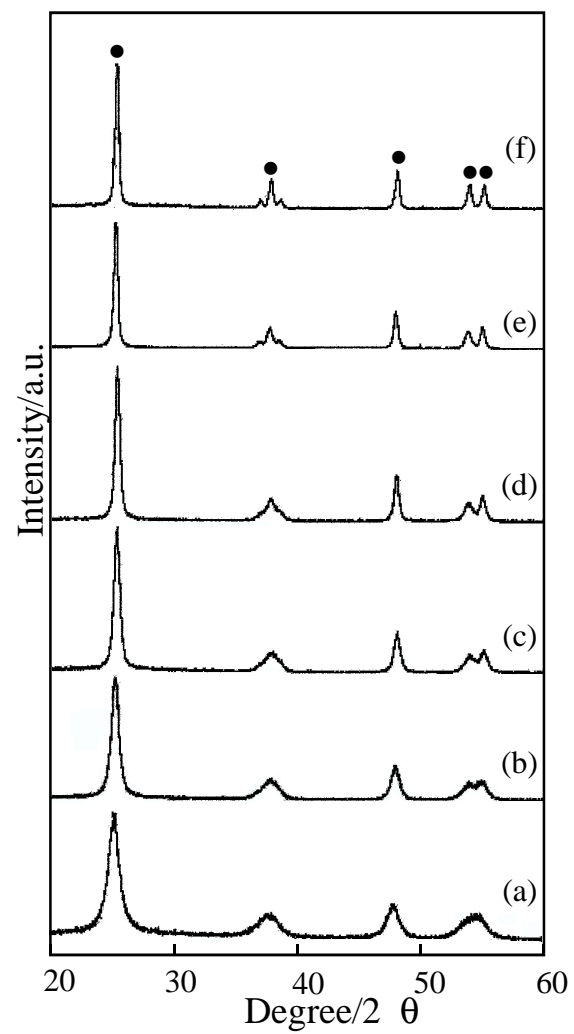

**Figure S. 1** XRD patterns of (a) un-treated  $\text{TiO}_2$ , (b)  $\text{TiO}_2(573)$ , (c)  $\text{TiO}_2(673)$ , (d)  $\text{TiO}_2(773)$ , (e)  $\text{TiO}_2(873)$  and (f)  $\text{TiO}_2(973)$ . ●: anatase structure

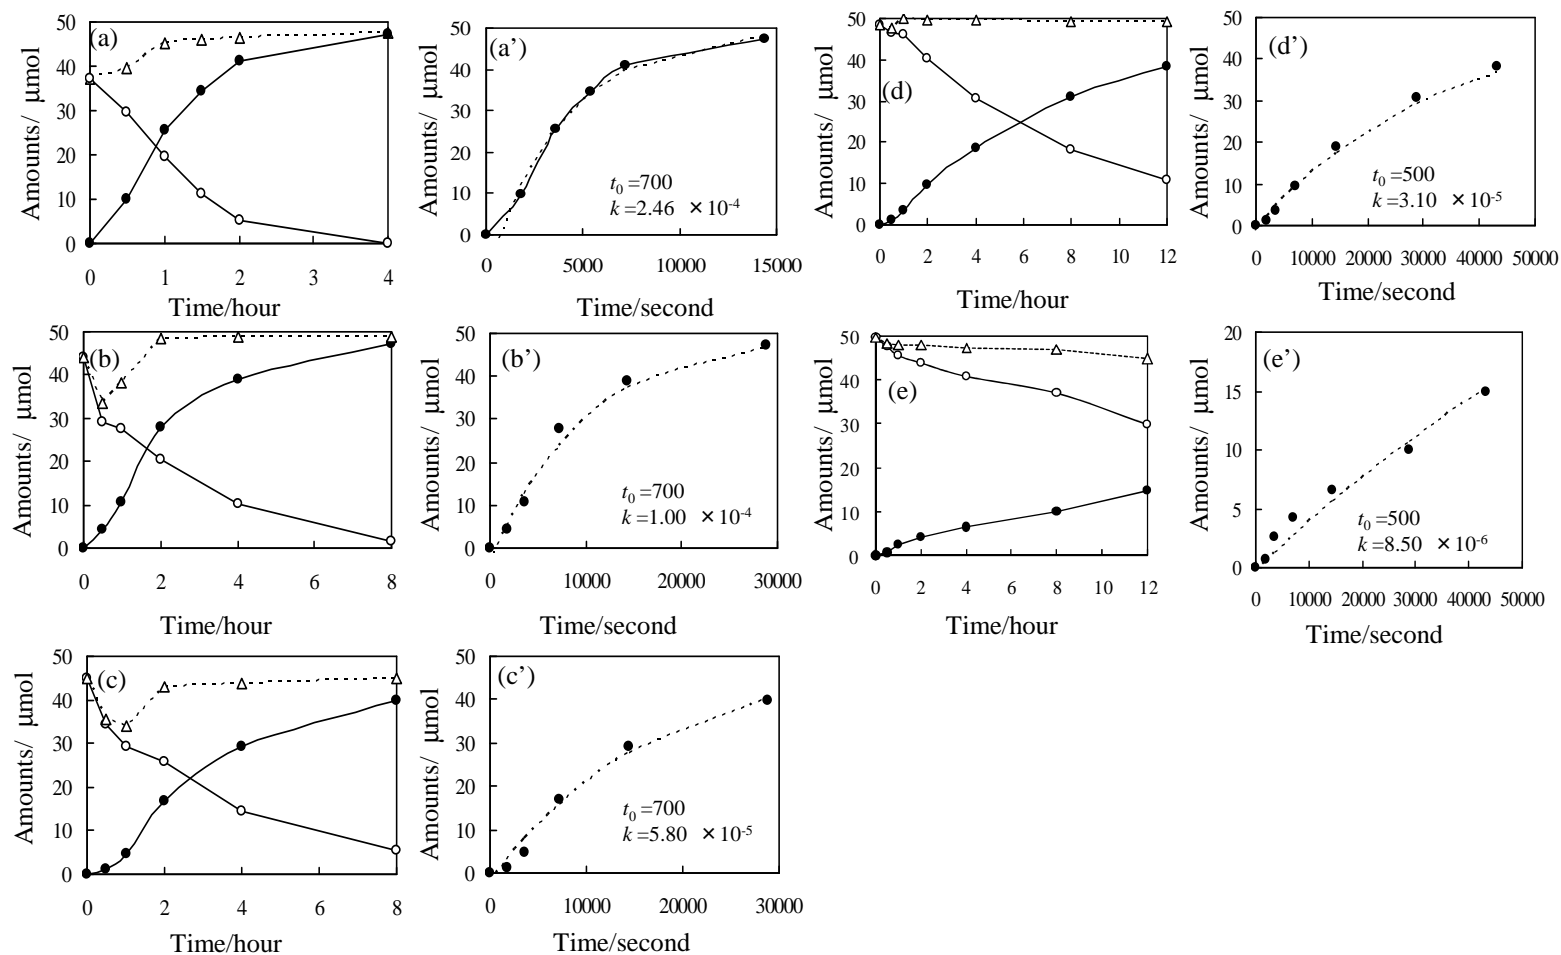

**Figure S. 2** Time profile for the photocatalytic oxidation of benzyl alcohol on the heat-treated TiO<sub>2</sub> (a - e) in the presence of O<sub>2</sub> under visible light irradiation, and the simulation (broken line) of amounts of photo-formed benzaldehyde (a'-e'). a, a': un-treated TiO<sub>2</sub>, b, b': TiO<sub>2</sub>(673), c, c': TiO<sub>2</sub>(773), d, d': TiO<sub>2</sub>(873), e, e': TiO<sub>2</sub>(973).  $\bullet$ : amount of benzaldehyde;  $\circ$ : amount of benzyl alcohol;  $\Delta$ : amount of benzyl alcohol and benzaldehyde in total.

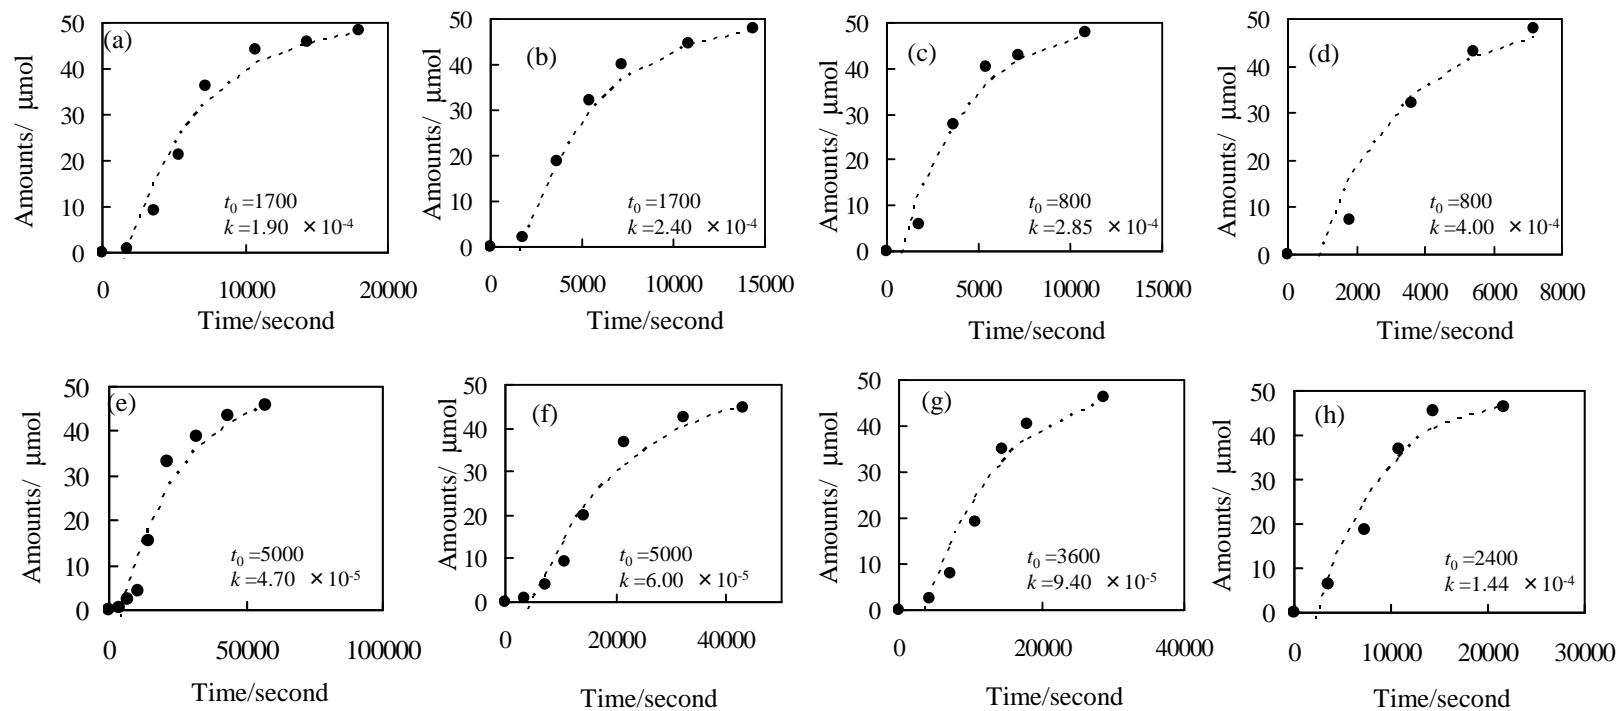

**Figure S. 3** Time profile for the the photocatalytic oxidation of normal benzyl alcohol (a - d) and  $\alpha$ ,  $\alpha$ -d2 benzyl alcohol (e - h) on  $\text{TiO}_2$  with experiment (●) and its simulation (broken line). The reaction temperatures were controlled at 283 K (a, e), 293 K (b, f), 303 K (c, g) and 313 K (d, h).

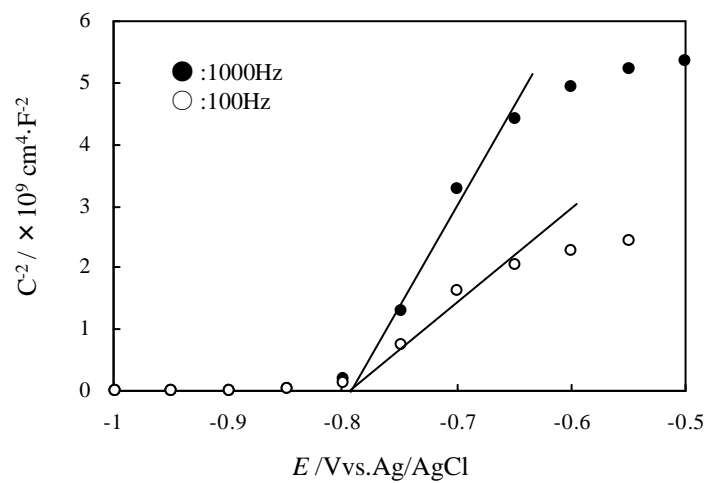

**Figure S. 4** Mott-Schottky plots of the  $\text{TiO}_2$  film electrode at the modulation frequency of 100 and 1000 Hz. The measurements were performed in acetonitrile solution involving 0.1 M  $\text{LiClO}_4$  and 5 mM benzyl alcohol (pH = 3.8).

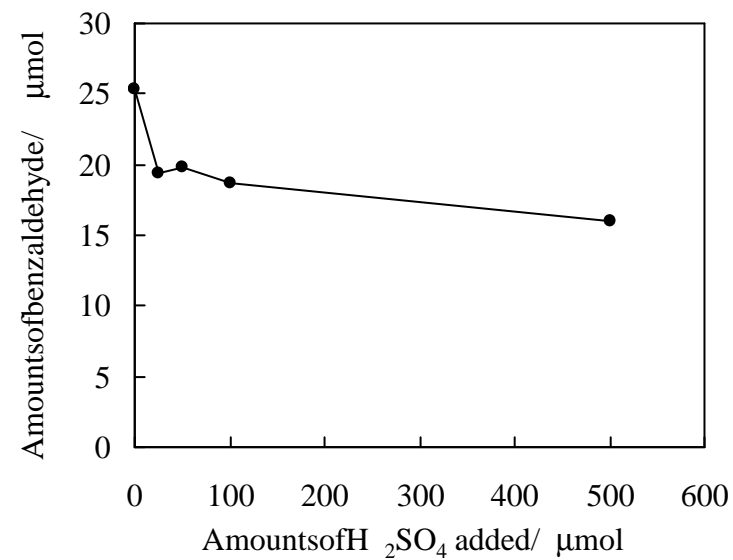

**Figure S. 5** Plots for the amount of photo-formed benzaldehyde as a function of the amounts of conc. H<sub>2</sub>SO<sub>4</sub> added. The photocatalytic oxidation of benzyl alcohol (50 µmol) was performed in acetonitrile solution on TiO<sub>2</sub> (50 mg) for 1h.
